# Supplementary material
Source: PubMed Central journal article supplement (PMC3398571)
Supplement: supp_tpc.112.095869_tpc095869Supplemental.pdf [file supp_tpc.112.095869_tpc095869Supplemental.pdf]

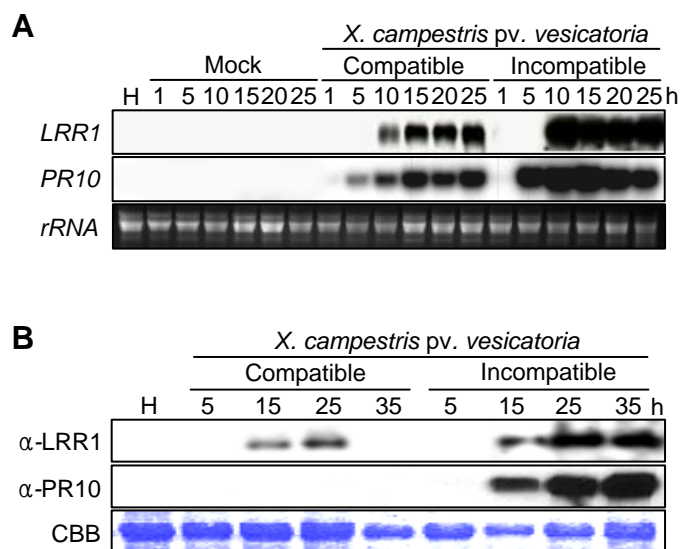

**Supplemental Figure 1.** Expression Patterns of *PR10* in Pepper Leaves Infected with *Xanthomonas campestris pv. vesicatoria* (*Xcv*).

**(A)** Induction of *LRR1* and *PR10* in leaf tissues at various time points after inoculation with virulent (compatible) strain Ds1 and avirulent (incompatible) strain Bv5-4a of *Xcv*. *LRR1*- and *PR10*-specific probes were labeled with  $\alpha$ -[ $^{32}$ P] dCTP. Equal loading (20  $\mu$ g) was verified by visualizing rRNA on a gel stained with ethidium bromide. H, healthy leaves; Mock, MgCl<sub>2</sub> infiltration.

**(B)** Immunoblot analysis of *LRR1* and *PR10* expression in pepper leaf tissues at various time points after inoculation with *Xcv* virulent (compatible) strain Ds1 and avirulent (incompatible) strain Bv5-4a. Total proteins were extracted and immunoblotted using *LRR1*- and *PR10*-specific antibodies to detect the protein expression levels. H, healthy leaves; CBB, Coomassie brilliant blue staining of the gel to show equal loading.

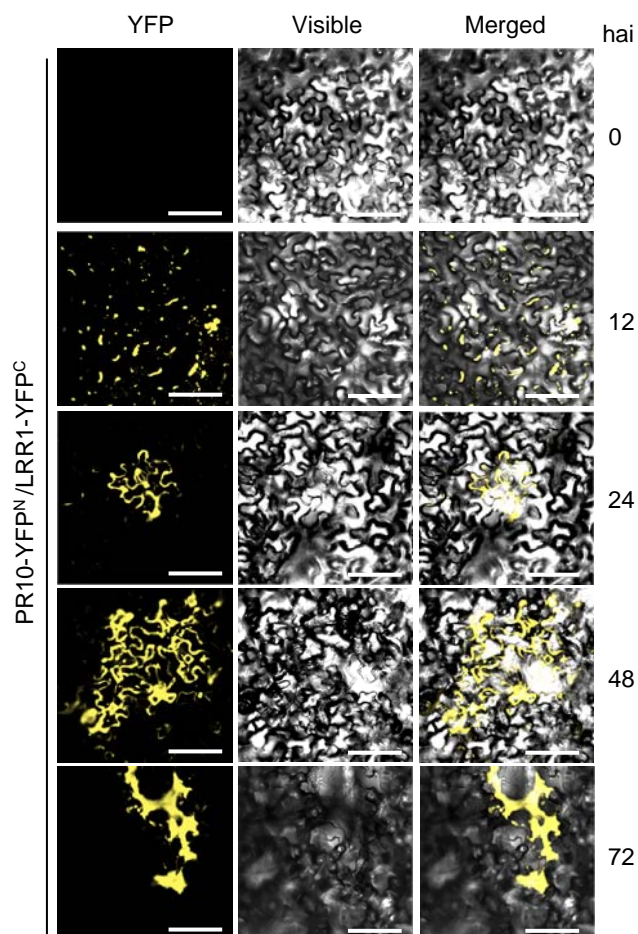

**Supplemental Figure 2.** LRR1 and PR10 Interact in the Cytoplasm and Are Released into the Apoplast.

Bimolecular fluorescence complementation (BiFC) was used to visualize the LRR10/PR10 interaction in *Nicotiana benthamiana* leaves infiltrated with *Agrobacterium*. Yellow fluorescence, visible light and merged images were taken of epidermal cells infiltrated with a mixture of *Agrobacterium* suspensions harboring the constructs encoding LRR1-YFP<sup>C</sup> and PR10-YFP<sup>N</sup> fusion proteins. Time course images were obtained by a confocal microscopy after *Agro*-infiltration. Bars=100 μm.

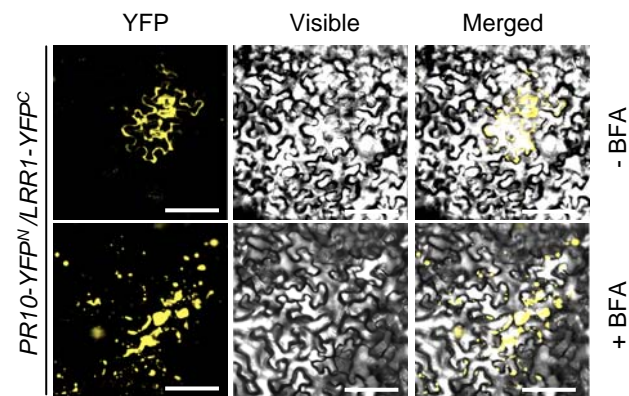

**Supplemental Figure 3.** Localization of the LRR1 and PR10 Complex in *Nicotiana benthamiana* Leaves Treated with BFA ( $10 \mu\text{g mL}^{-1}$ ), an Inhibitor of Secretion, 24 h after *Agro*-infiltration. BiFC images were obtained by a confocal microscopy. Yellow fluorescence, visible light and merged images were taken of epidermal cells infiltrated with a mixture of *Agrobacterium* suspensions harboring the constructs encoding the LRR1-YFP<sup>C</sup> and PR10-YFP<sup>N</sup> fusion proteins. Bars=100  $\mu\text{m}$ .

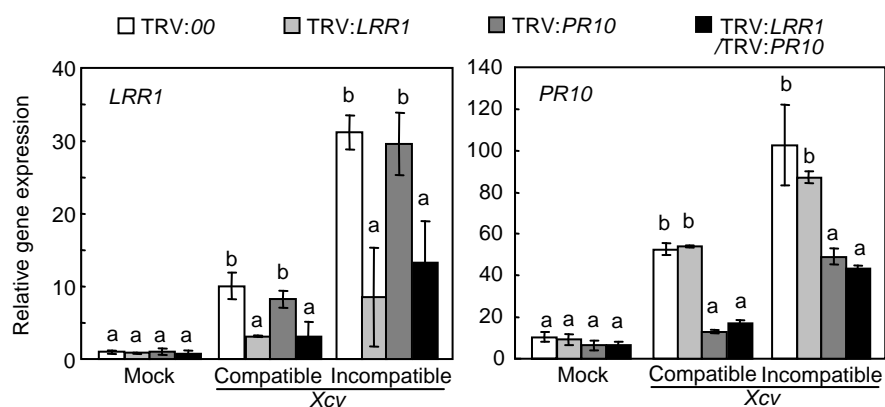

**Supplemental Figure 4.** Quantitative Real-Time RT-PCR Analysis of the Expression of *LRR1* and/or *PR10* in the Empty Vector Control (TRV:00) and VIGS Pepper Leaves 24 h after Inoculation with Virulent (compatible) Strain Ds1 and Avirulent (incompatible) Strain Bv5-4a of *Xanthomonas campestris* pv. *vesicatoria* (Xcv). Expression values are normalized by the expression level of *ACTIN*. Data represent the means  $\pm$  standard deviations from three independent experiments. Different letters indicate significant differences, as statistically analyzed by Fisher's protected least significant difference (LSD) test ( $P < 0.05$ ). Mock, treated with 10 mM MgCl<sub>2</sub>.

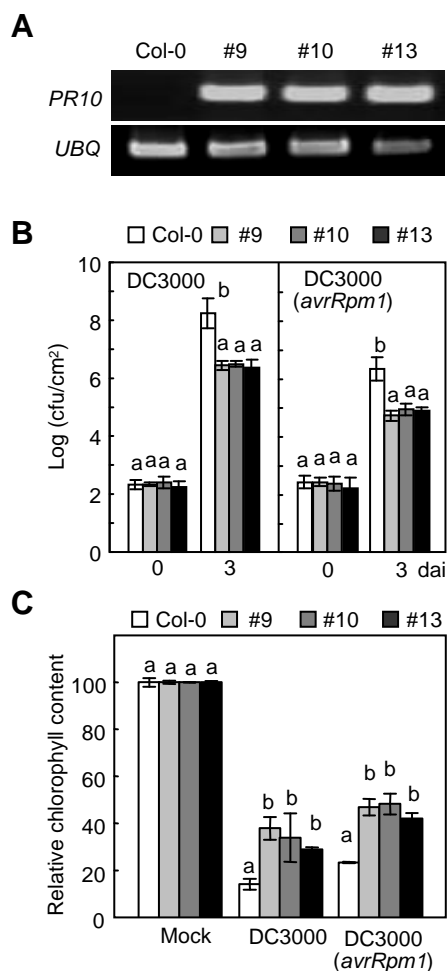

**Supplemental Figure 5.** Enhanced Resistance of *PR10*-OX Transgenic *Arabidopsis* Lines to Infection by *Pseudomonas syringae* pv. *tomato* (*Pst*).

(A) RT-PCR analysis of the expression of the *PR10* gene in the leaves of the wild type (WT) and three transgenic lines.

(B) Bacterial growth and (C) chlorophyll content in the leaves of the wild-type and transgenic plants infected by *Pst* DC3000 and *Pst* DC3000 (*avrRpm1*) ( $5 \times 10^4$  cfu mL<sup>-1</sup>).

(A-C) Data represent the means  $\pm$  standard deviations from three independent experiments. Different letters indicate significant differences, as analyzed by Fisher's protected least significant difference (LSD) test ( $P < 0.05$ ).

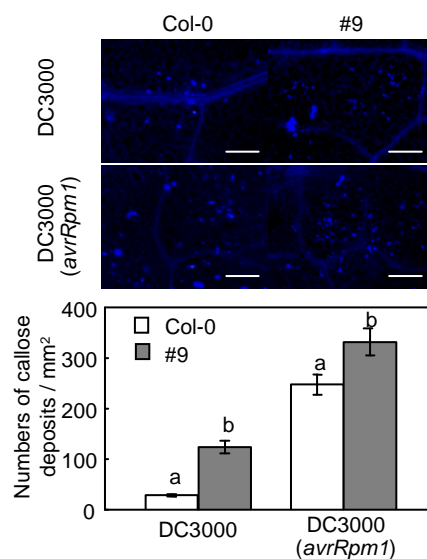

**Supplemental Figure 6.** PR10 Contributes to Basal Resistance by Callose Deposition. Callose deposition (bright blue dots) and numbers of callose deposits in wild-type and transgenic plant leaves stained with aniline blue, as observed by fluorescence microscopy. Data represent the means  $\pm$  standard deviations from three leaves of each plant in three independent experiments. Different letters above the bars indicate significantly different means ( $P < 0.05$ ), as statistically analyzed by Fisher's protected least significant difference (LSD) test.

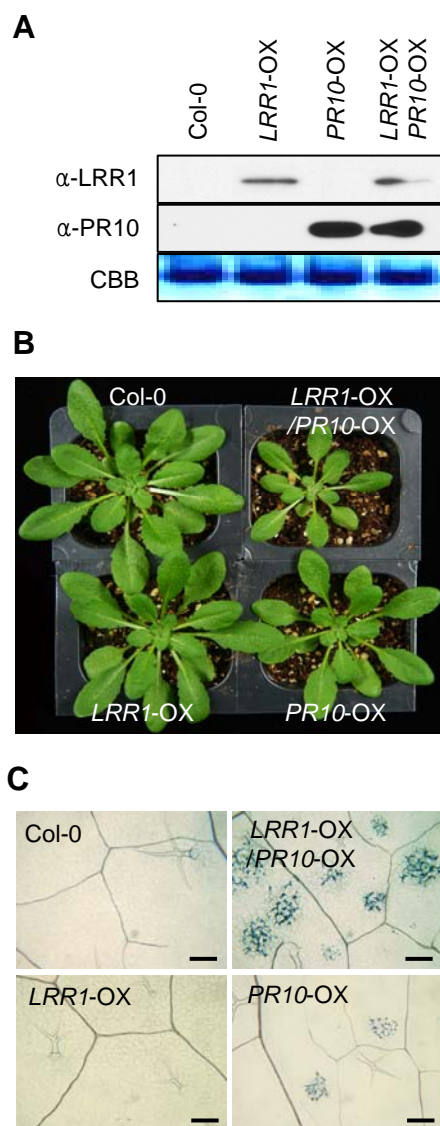

**Supplemental Figure 7.** Transgenic *Arabidopsis* Plants Overexpressing *LRR1* and/or *PR10*.

**(A)** Immunoblot analysis of PR10 and LRR1 expression in wild-type (WT) and transgenic plants. Gene-specific antibodies were used for the detection of PR10 and LRR1. CBB, Coomassie brilliant blue staining of the gels to verify equal loading.

**(B)** Growth phenotypes of 5-week-old wild-type and transgenic *Arabidopsis* plants.

**(C)** Spontaneous cell death response in *LRR1-/PR10-OX* leaf tissues, as detected by trypan blue staining. Bars=200  $\mu$ m.

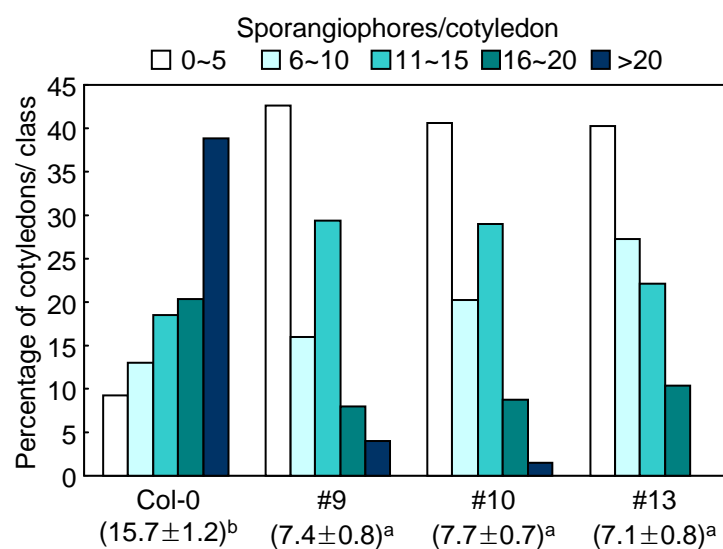

**Supplemental Figure 8.** Enhanced Resistance of *PR10-OX* Transgenic *Arabidopsis* Lines to Infection by *Hyaloperonospora arabidopsidis*. Quantification of asexual sporangiophores on 50 cotyledons 7 days after inoculation. The number below each line represents the mean of sporangiophores/cotyledon, as classified into five groups: 0 ~ 5, 6 ~ 10, 11 ~ 15, 16 ~ 20, and > 20. Data represent the means ± standard deviations from three independent experiments. Different letters indicate significant differences, as analyzed by Fisher's protected least significant difference (LSD) test ( $P < 0.05$ ).



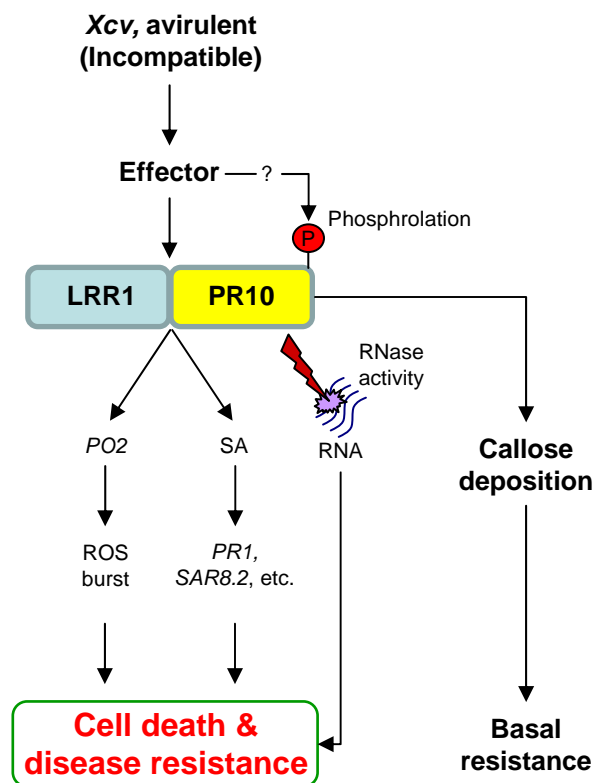

**Supplemental Figure 9.** Proposed Model for the Role of the PR10 and LRR1 Complex in Cell Death-Mediating Defense Signaling in Plants.

Supplemental Table 1. Gene-Specific Primers for qRT-PCR Used in This Study

| Gene                    | Forward and reverse primer                                             |
|-------------------------|------------------------------------------------------------------------|
| <i>LRR1</i>             | F:5'-ATGAGGTTTCATTGCCCTGG-3'<br>R:5'-CTAGGCTTTCATGTCTTGGAC-3'          |
| <i>PR10</i>             | F:5'-ATGGGTGCTTATACCTTTACTGAC-3'<br>R:5'-TTAAACATAGACAGAAGGATTGG-3'    |
| Ca <i>PR1</i>           | F:5'-CAGGATGCAACACTCTGGTGG-3'<br>R:5'-ATCAAAGGCCGGTTGGTC-3'            |
| Ca <i>DEF1</i>          | F:5'-CAAGGGAGTATGTGCTAGTGAGAC-3'<br>R:5'-TGCACAGCACTATCATTGCATAC-3'    |
| Ca <i>SAR82</i>         | F:5'-CAGGGAGATGAATTCTGAGGC-3'<br>R:5'-CATATGAACCTCTATGGATTTCTG-3'      |
| Ca <i>PO2</i>           | F:5'-ATGGCAGAGAAAACCACCAGCA-3'<br>R:5'-TCAAAAAAAAAAGTGACCTCCTTTCTGT-3' |
| Ca <i>ACT</i>           | F:5'-TTGGA CTCTGGTGATGGTGTG-3'<br>R:5'-AACATGGTTGAGCCACCACTG-3'        |
| Nb <i>VPE1a</i>         | F:5'-CAGGCCGACGTGTGCCACGCG-3'<br>R:5'-GGCGTCGCTTTGGTTGATAGCCTGTTG-3'   |
| Nb <i>HSR203J</i>       | F:5'-GAGCCCTGGCTCAACAATTA-3'<br>R:5'-CATATGAACCTCTATGGATTTCTG-3'       |
| Nb $\beta$ - <i>TUB</i> | F:5'-GGAGTTTACCGAGGCTGAAAG-3'<br>R:5'-CCTCCTGAGCTTCTCTTCAT-3'          |
| At <i>PR1</i>           | F:5'-GGAGCTACGCAGAACAATA-3'<br>R:5'-AGTATGGCTTCTCGTTCACA-3'            |
| At <i>SAG13</i>         | F:5'-CTCTTGTGACCAACGAGTGA-3'<br>R:5'-TCATTTGCTTCTCCAACACG-3'           |
| At <i>RbohD</i>         | F:5'-AACGGCCTCTTACTCTCTGCCAAGT-3'<br>R:5'-TCATTTGCTTCTCCAACACG-3'      |
| At <i>ACTIN2</i>        | F:5'-AAGCTCTCCTTTGTTGCTGTT-3'<br>R:5'-GACTTCTGGGCATCTGAATCT-3'         |

Supplemental Table 2. Primers for Generation of Various Gene Constructs Used in This Study.

| Gene                                                    | Forward and reverse primer                                                                        |
|---------------------------------------------------------|---------------------------------------------------------------------------------------------------|
| <i>LRR1</i> for pGADT7 and pGBKT7                       | F:5'-CATATGGGATCCATGAGGTTTCATTGCC-3'<br>R:5'-GGATCCAGGCTTTCATGTCTTGGACA-3'                        |
| <i>PR10</i> for pGADT7 and pGBKT7                       | F:5'-CATATGATGGGTGCTTATACCTTTACTGAC-3'<br>R:5'-GGATCCAACATAGACAGAAGGATTGGC-3'                     |
| <i>LRR1</i> for pSPYNE, pSPYCE, p35S-6HA, and p35S-8Myc | F:5'-TCTAGAATGAGGTTTCATTGCCCTGGTATTC-3'<br>R:5'-GGATCCGGCTTTCATGTCTTGGAC-3'                       |
| <i>PR10</i> for pSPYNE, pSPYCE, p35S-6HA, and p35S-8Myc | F:5'-TCTAGAATGGGTGCTTATACCTTTACTGAC-3'<br>R:5'-GGATCCAACATAGACAGAAGGATTGG-3'                      |
| <i>PR10</i> for pET28a                                  | F:5'-GGATCCATGGGTGCTTATACCTTTAC-3'<br>R:5'-GAGCTCTTAAACATAGACAGAAGGATTGG-3'                       |
| <i>LRR1</i> for pGEX-5X                                 | F:5'-AAGGTCGTGGGATCCCGATGAGGTTTCATTGCCCTGGT-3'<br>R:5'-ATGCGGCCGCTCGAGCTAGGCTTTCATGTCTTGGACAAT-3' |
| <i>LRR1</i> for pBIN35S-GFP                             | F:5'-TCTAGATGAGGTTTCATTGCCCTG-3'<br>R:5'-GGATGGAGGCTTTCATATCTTG-3'                                |
| <i>PR10</i> for pBIN35S-GFP                             | F:5'-TCTAGATGGGTGCTTATACCTTTACTG-3'<br>R:5'-GGATCCGAACATAGACAGAAGG-3'                             |
| <i>PR10</i> for pBIN35S                                 | F:5'-TCTAGAATGGGTGCTTATACCTTTACTGAC-3'<br>R:5'-GGATCCTTAAACATAGACAGAAGGATTGGC-3'                  |
| <i>LRR1</i> for pTRV2                                   | F:5'-ATGGCCTCTATGTGAAAG-3'<br>R:5'-TTTGCTTGTGCTAGATATTA-3'                                        |
| <i>PR10</i> for pTRV2                                   | F:5'-CGGCACGGCAATCATC'-3'<br>R:5'-AATGTTTTGATTAATTTGCC-3'                                         |
